# Supplementary material
Source: PubMed Central journal article supplement (PMC6518030)
Supplement: EMBJ-38-e100972-s001.pdf [file EMBJ-38-e100972-s001.pdf]

## Appendix

| <b>Table of contents</b> | <b>page</b> |
|--------------------------|-------------|
| Appendix Figure S1       | 1           |
| Appendix Figure S2       | 2           |
| Appendix Figure S3       | 3           |
| Appendix Figure S4       | 4           |
| Appendix Figure S5       | 5           |
| Appendix Figure S6       | 6           |
| Appendix Figure S7       | 7           |

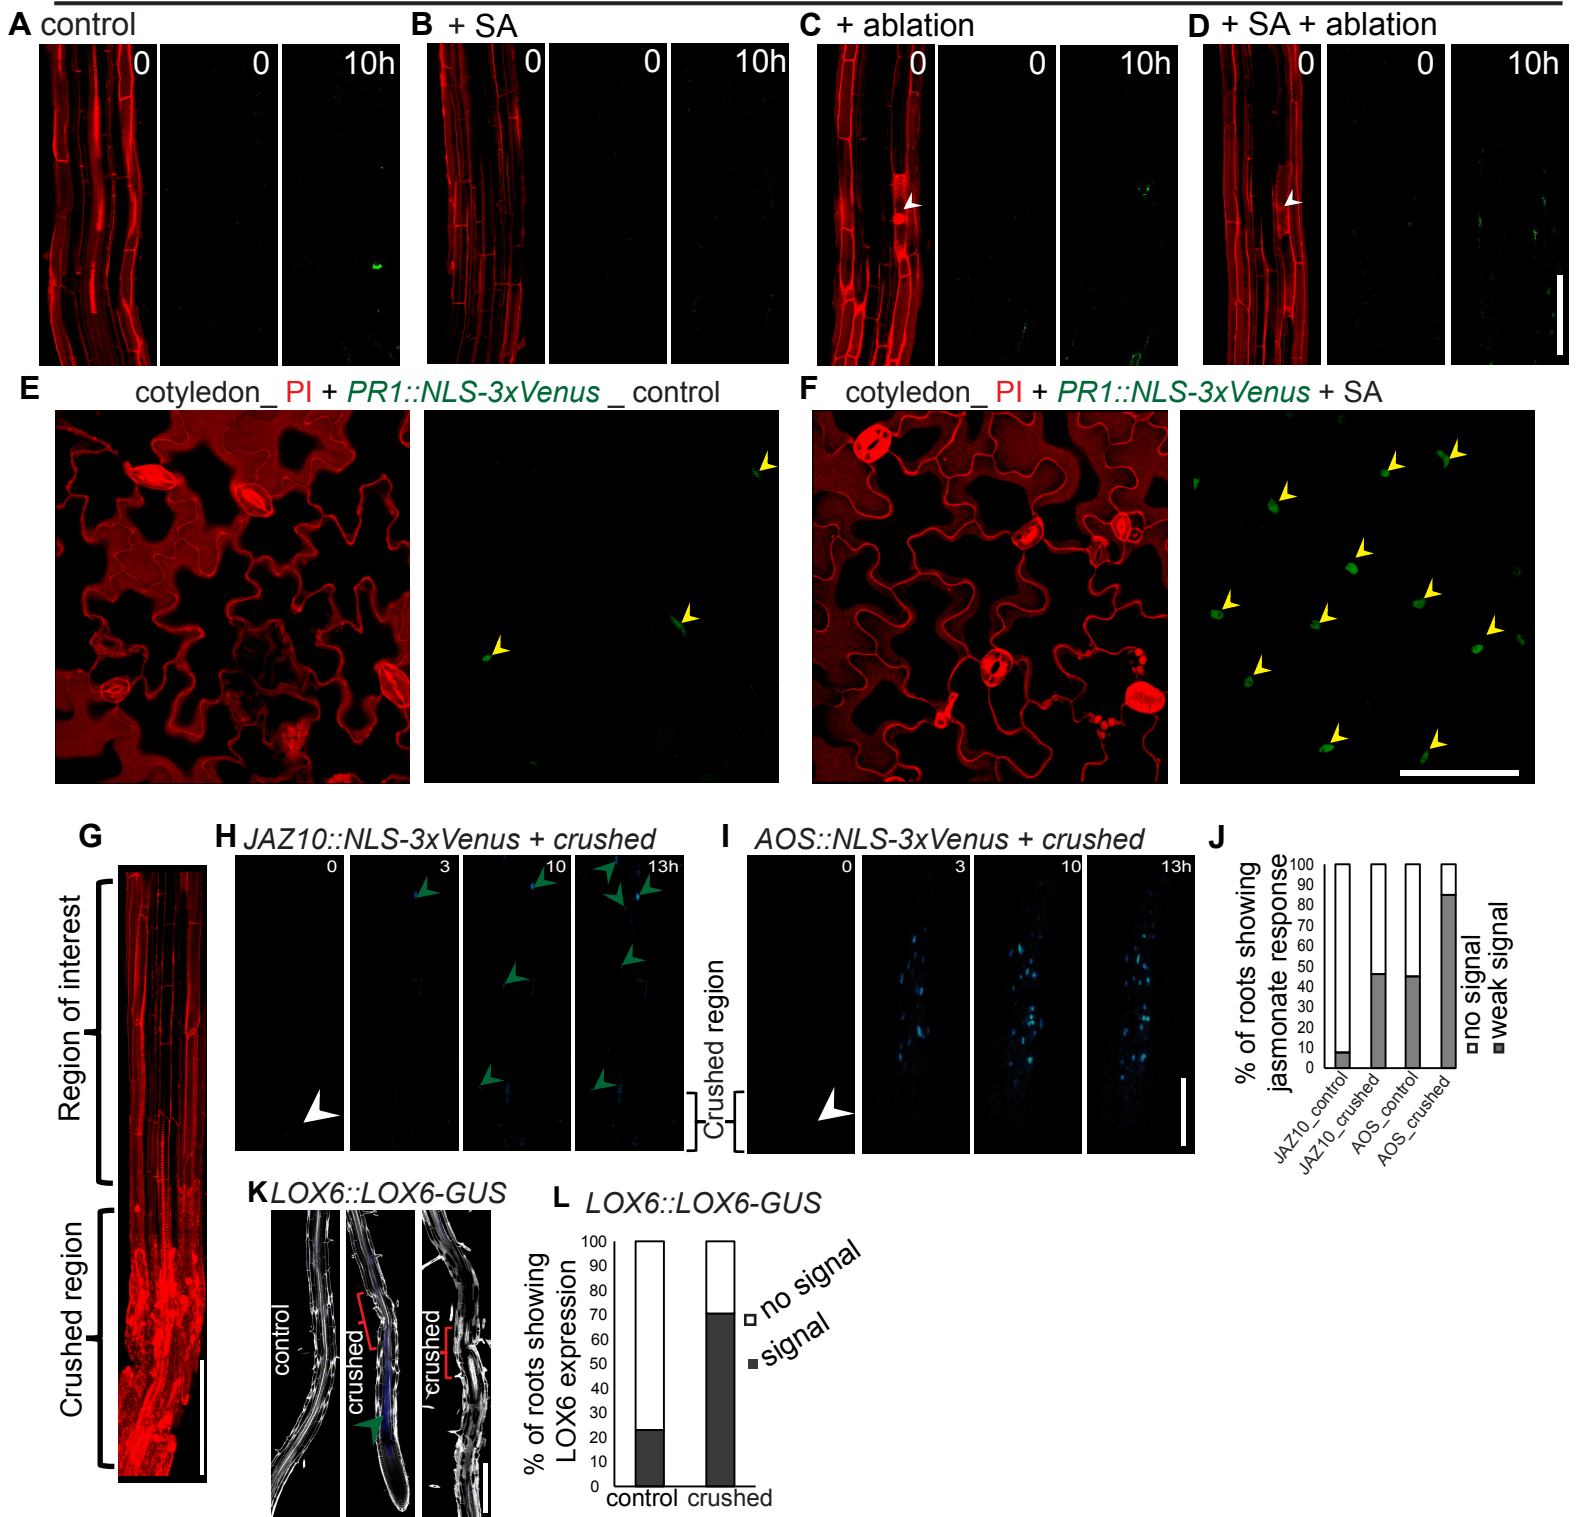

**Appendix Figure S1: Laser ablation does not lead to salicylic acid response**

(A - D) Time lapse, (xyz) maximum projection images of 4D tile-scan show expression of the salicylic acid response marker line *PR1::NLS-3xVenus* in the *Arabidopsis* root stained with PI (red). Laser ablation of cortex cell (C) does not induce expression of *PR1::NLS-3xVenus* neither in control media (C) nor in presence of 1 $\mu$ M SA (D). (E, F) Maximum projection images show the expression of *PR1::NLS-3xVenus* in cotyledons stained with PI (red) (E) before and (F) after treatment with 1 $\mu$ M SA (n=10). (G) Crushed *Arabidopsis* root tip stained with propidium iodide (PI). (H, J) 4D (xyzt) maximum projection images monitoring expression of the jasmonate response marker *JAZ10::NLS-3xVenus* (H), *AOS::NLS-3xVenus* (I) in root in response to crushing. (J) Percentage representation of roots of Non-damaged control root show no jasmonate response in 12 out of 13 roots in the *JAZ10::NLS-3xVenus* line. *AOS::NLS-3xVenus* control shows weak expression in 9 out of 20 roots. After manual damage of *JAZ10::NLS-3xVenus*, 14 roots showed no and 12 roots weak jasmonate response after crushing (n=26). The *AOS::NLS-3xVenus* shows jasmonate response in 17 roots (n=20). Example of weak response are shown in *JAZ10::NLS-3xVenus* (H) and in the *AOS::NLS-3xVenus* (I). Live-imaging time points are indicated in the top right corner of each frame. (K) 3D (xyz) maximum projection images demonstrating jasmonate biosynthesis gene response *LOX6::LOX6-GUS* after crushing (n=15). (L) The *LOX6::LOX6-GUS* shows response in 5 out-of 15 roots after crushing. In non-crushed control roots *LOX6::LOX6-GUS* induction was observed in 3 out-of 15 roots. (K) After GUS (blue stain) reaction roots were stained in ClearSee solutions containing calcofluorwhite (white stain) to visualize cell walls. Representative images are shown (for control root without GUS is shown – on left side). Scale bar, (A - F) 50  $\mu$ m (G, H, I, K) 100  $\mu$ m.



PI + ACS6::*NLS-3xVenus*

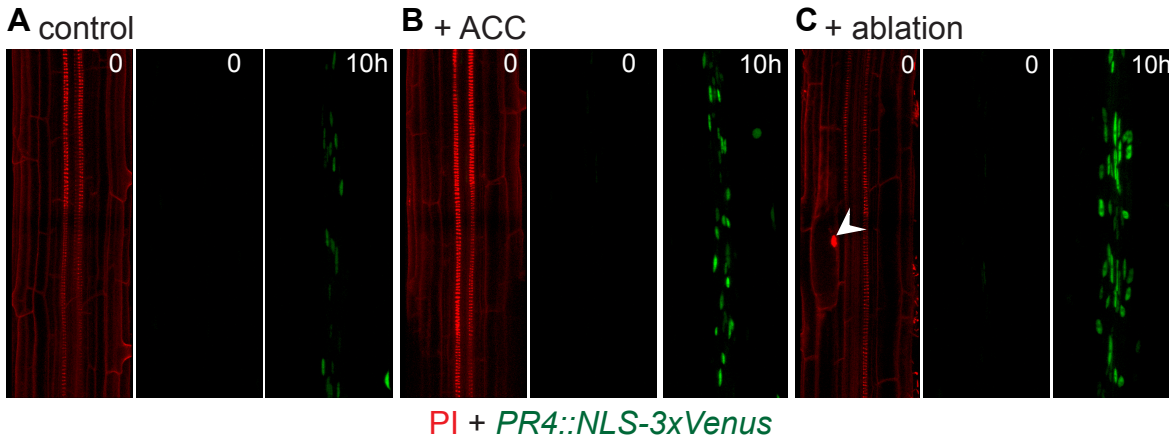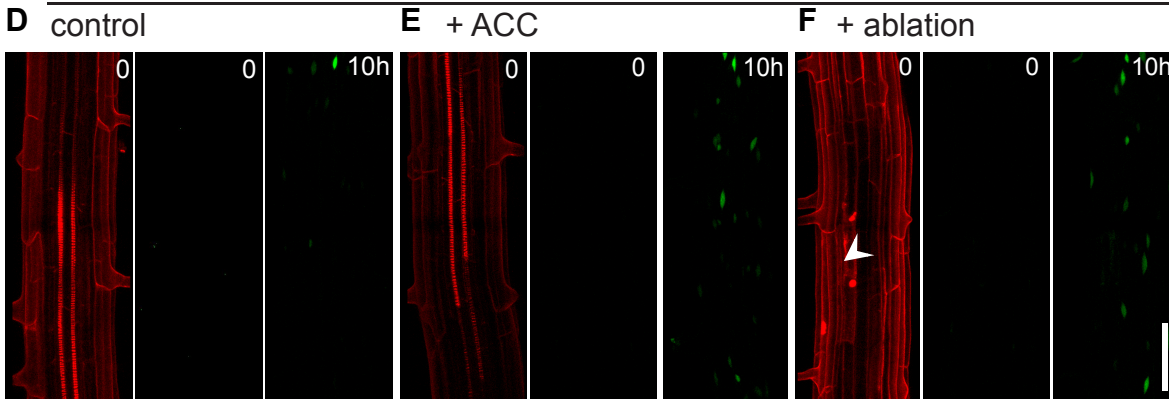

**G** ACS6::*NLS-3xVenus* \_ control    **H** ACS6::*NLS-3xVenus* + crushed

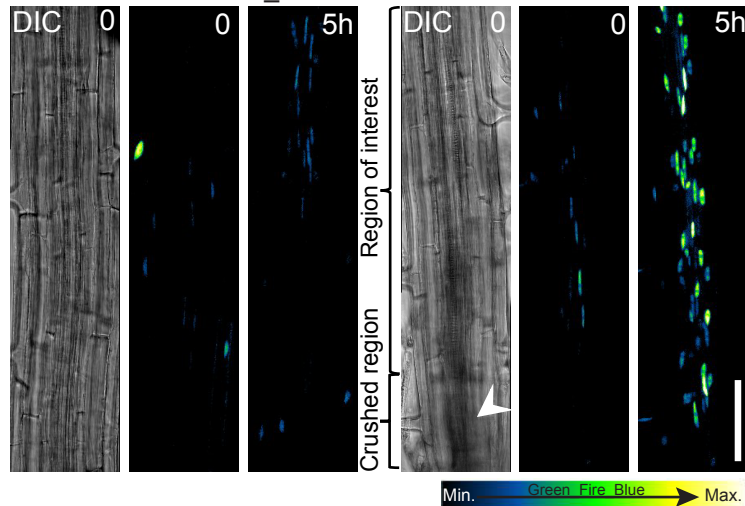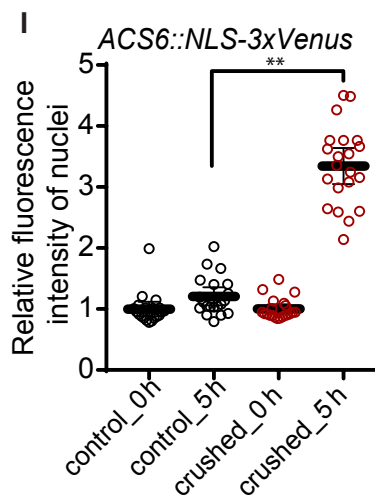

**Appendix Figure S2: Mechanically crushing roots leads to ethylene response**

(A - F) Real time monitoring 4D (xyzt) maximum projection images of ethylene response marker lines *ACS6::NLS-3xVenus* (A - C), *PR4::NLS-3xVenus* (D - F) in the root with/without 2μM 1-aminocyclopropanecarboxylic acid (ACC) before/after laser ablation of cortex cells. *ACS6::NLS-3xVenus* (C), *PR4::NLS-3xVenus* (F) biosynthesis and response markers and enhances differences upon laser ablation of single cortex cell as well as upon 2μM ACC treatment regardless of ablation *ACS6::NLS-3xVenus* (B, C), *PR4::NLS-3xVenus* (E, F). Live-imaging time points are indicated in the top right corner of each frame. (A - F) n=10 roots repeated two times; time-lapse of representative movies are shown. (G - I) 4D (xyzt) maximum projection images monitoring expression and (I) quantification of the ethylene response marker *ACS6::NLS-3xVenus* in the root in response to crushing (\*\*p < 0.005, n = 20 - 21 roots, pooled from two independent experiments (n = 10 - 11 roots), error bars indicate mean value with 95% CI, representative pictures are shown). Scale bar, (A - F) 50 μm, (G, H) 100 μm.

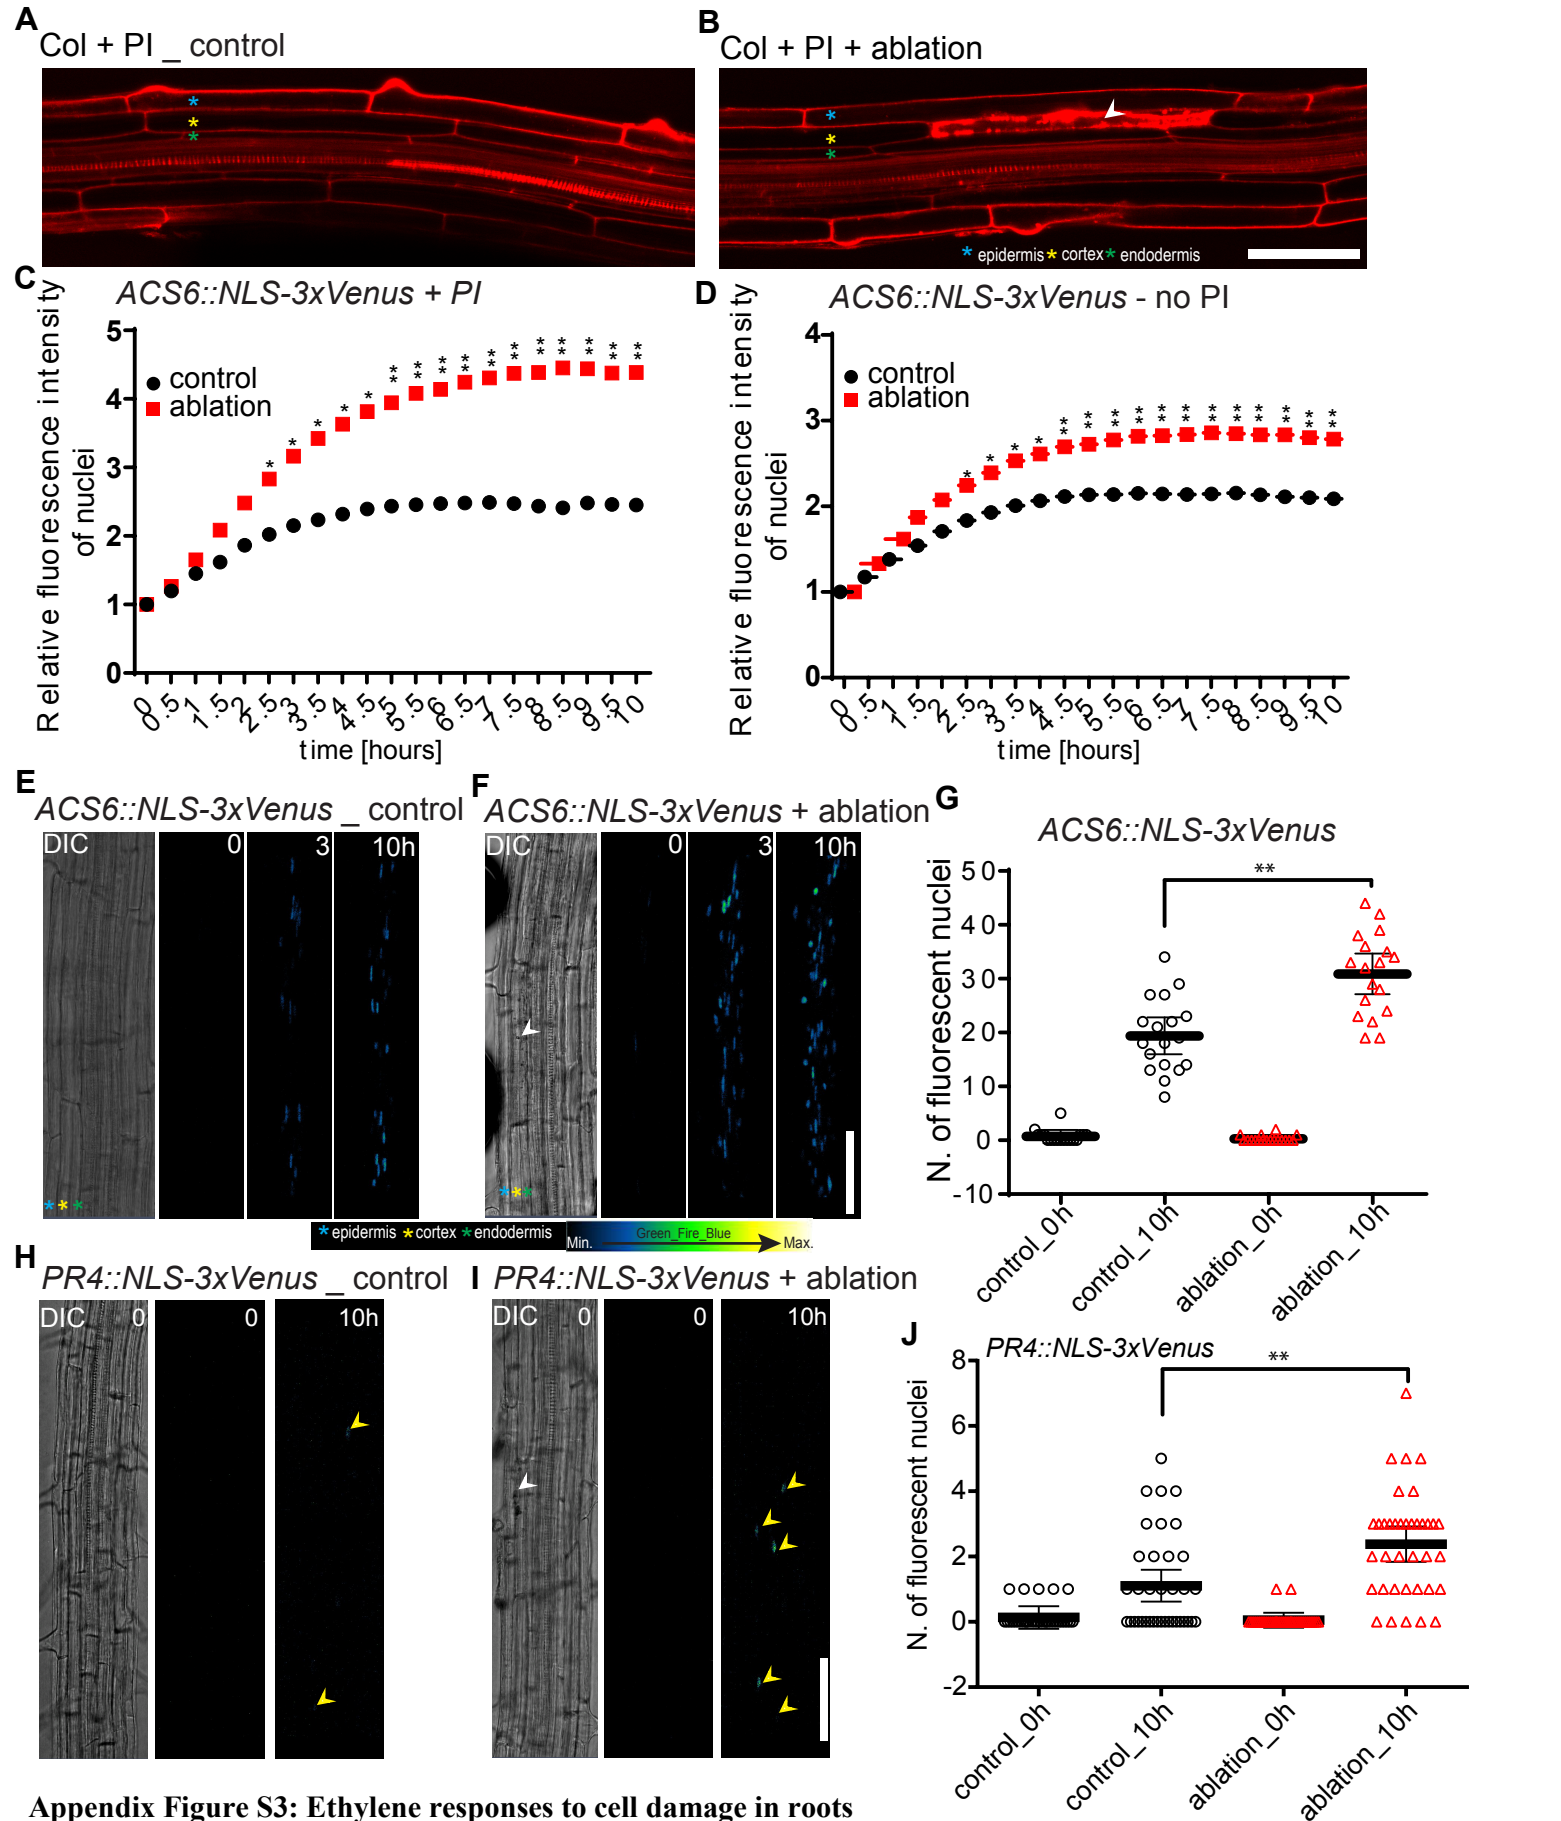

### Appendix Figure S3: Ethylene responses to cell damage in roots

(A, B) Propidium iodide (PI) stained root (red). Control (A), penetration of PI from cell walls into the ablated cortex cells (B) visualizes cell death (white arrowhead). (C) Roots stained with PI show attenuated background induction during time-lapse observations of the *ACS6* response marker and enhanced differences upon laser ablation of single cortex cell, as compared to (D). Quantification of average signal intensity (\* $p < 0.05$ , \*\* $p < 0.01$ ,  $n = 10$  roots, repeated three times). (D - G) Despite background induction, time lapse imaging after laser ablation of single cortex cell without PI still shows induced expression of ethylene response marker line *ACS6::NLS-3xVenus*, quantified both as increases in average signal intensity (D) and number of cells with positive nuclear signal (G) (\*\* $p < 0.005$ ,  $n = 6$  roots, repeated three times, error bars indicate mean value with 95% CI). Representative time lapse images shown in (E, F). (H, I) Cortex cell ablation also induces expression of *PR4::NLS-3xVenus* in the root. Representative pictures of real time monitoring 4D (xyzt) maximum projections shown. (J) After laser ablation, the number of cells with positive nuclear *PR4::NLS-3xVenus* signal increased (\*\* $p < 0.005$ ,  $n = 37$  roots, error bars indicate mean value with 95% CI). Time points are indicated in the top right corner of each frame. (E, F, H, I) movies were recorded within 10 hours with 30 minutes interval per frame. Scale bar: (A, B) 50  $\mu\text{m}$  (E, F, H, I) 100  $\mu\text{m}$ .

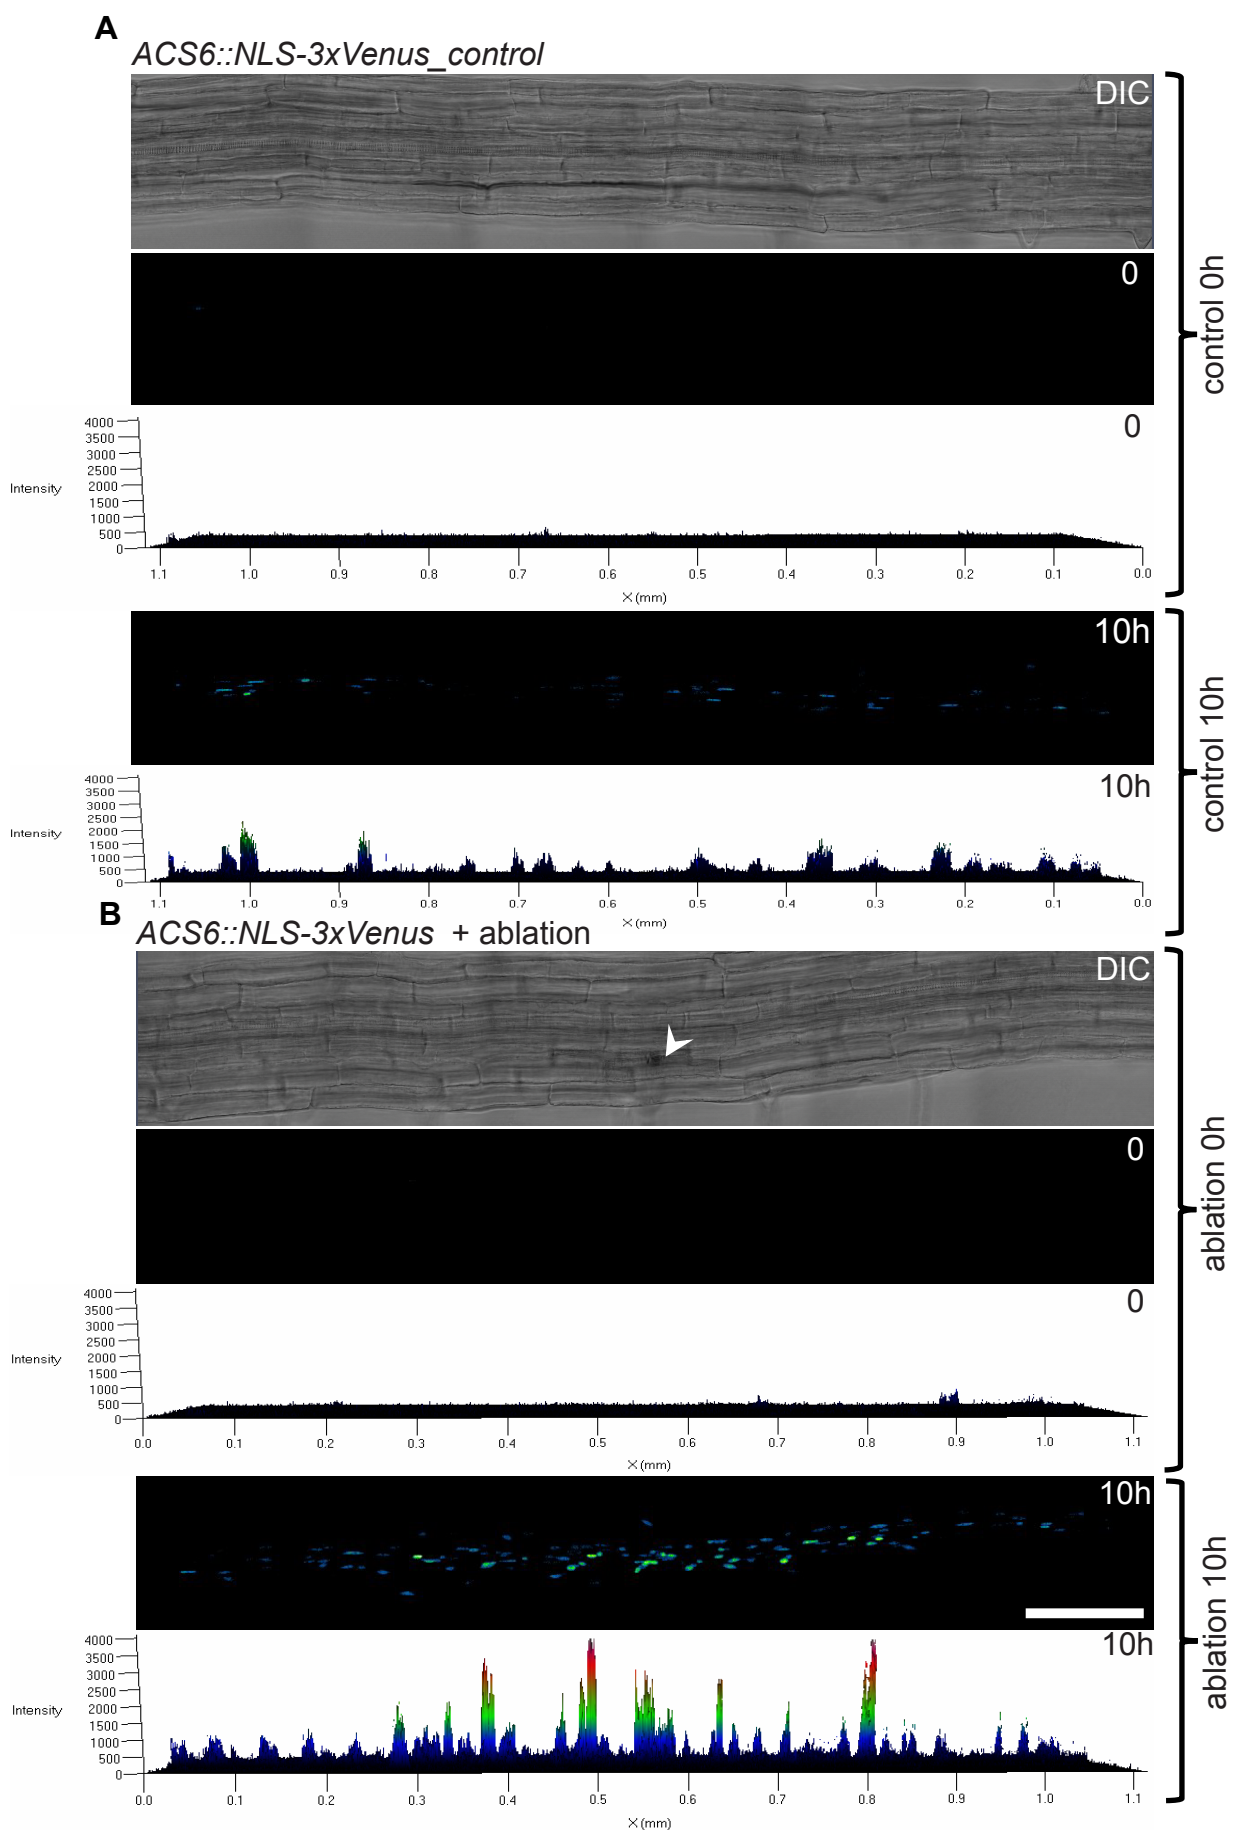

**Appendix Figure S4: Ethylene response to cell ablation is a localized, non-systemic response**

(A, B) 3D projection of a tile scan showing *ACS6::NLS-3xVenus* expression and intensity plots, visualising the spatially restricted increase of *ACS6::NLS-3xVenus* expression upon laser ablation after 10h (B) when compared to control (A). Representative pictures are shown (n=7 roots). Time points are indicated in the top right corner of each frame. White arrow indicates ablated cell. Scale bar: (A, B) 100  $\mu$ m.



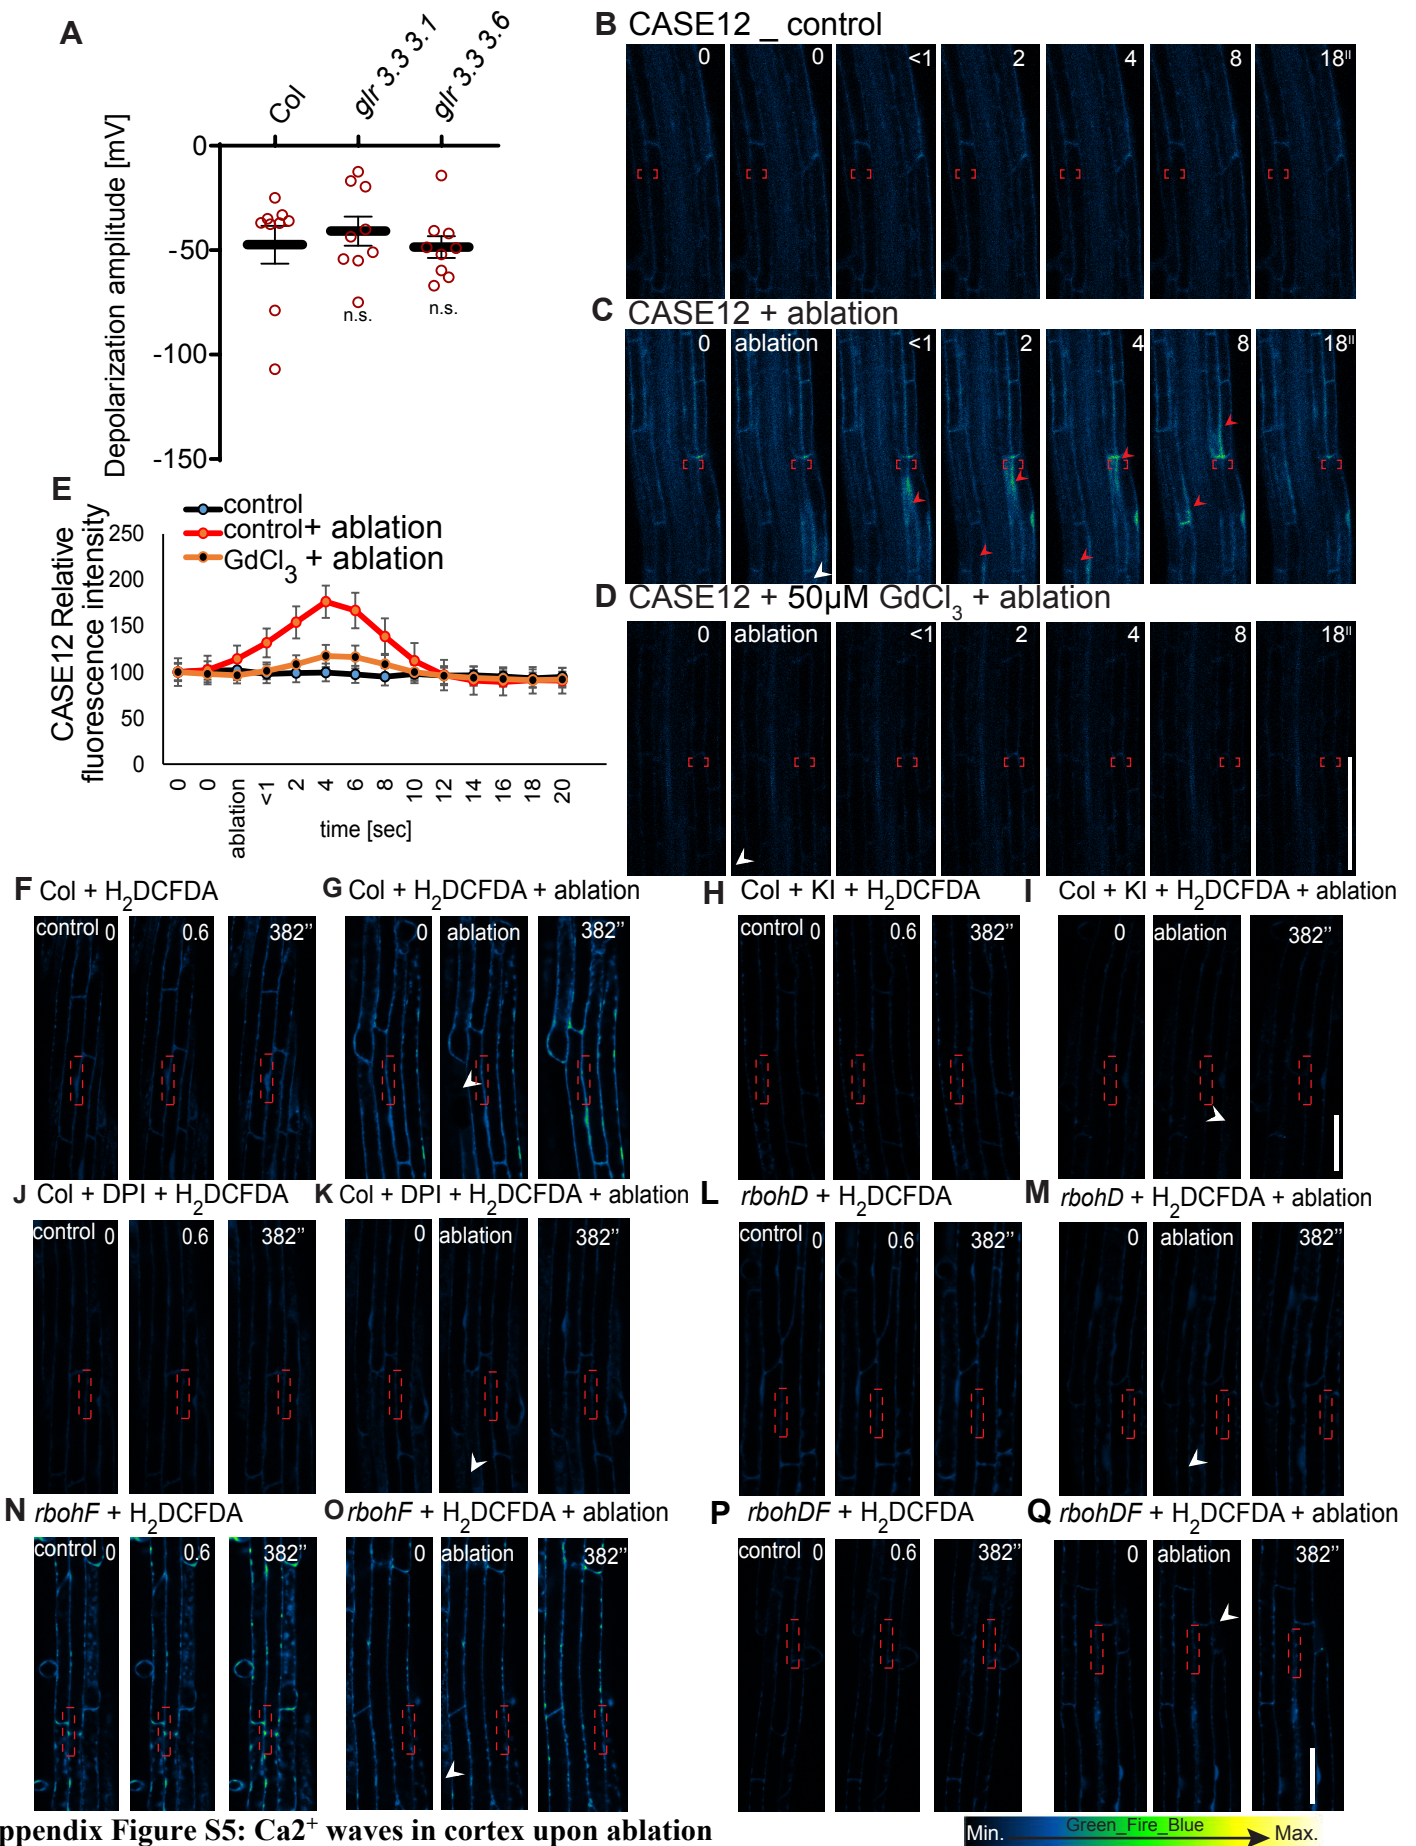

### Appendix Figure S5: Ca<sup>2+</sup> waves in cortex upon ablation

(A) Quantification of depolarization amplitudes after cortex cell ablation were not reduced in glutamate receptor mutants (*glr3.3 3.1* and *glr3.3 3.6*) when compared to the wt (col) (n=10 roots, error bars indicate standard error). (B - D) Representative time-lapse images of calcium wave propagation using a CASE12 reporter line. Live-imaging time points are indicated in seconds at top right corner of each frame. Laser ablation of a cortex cell leads to signal increases immediately after ablation at the ablated side with slide delay on opposite side of the root in cortex cells (C) and was not observed in non-ablated controls (B). Calcium transport inhibitor GdCl<sub>3</sub> (50  $\mu$ M) lowered calcium wave propagation after ablation (D). White arrowheads indicate ablation position, red arrowheads indicate calcium wave propagation. (E) Quantification of signal intensities of time lapses as shown in (B - E) (n=10 roots, repeated two times, error bars indicate standard error). (F - Q) Visualizations and of ROS production after single cell laser ablation. For ROS visualization, 20 $\mu$ M H<sub>2</sub>DCFDA was used. Time points in seconds at top right corners of images. White arrowheads indicate ablated cells, red frames indicate regions of signal quantification used for graphs (see Fig 5 C - E). Scale bar: (B - D and F - Q) 100  $\mu$ m.

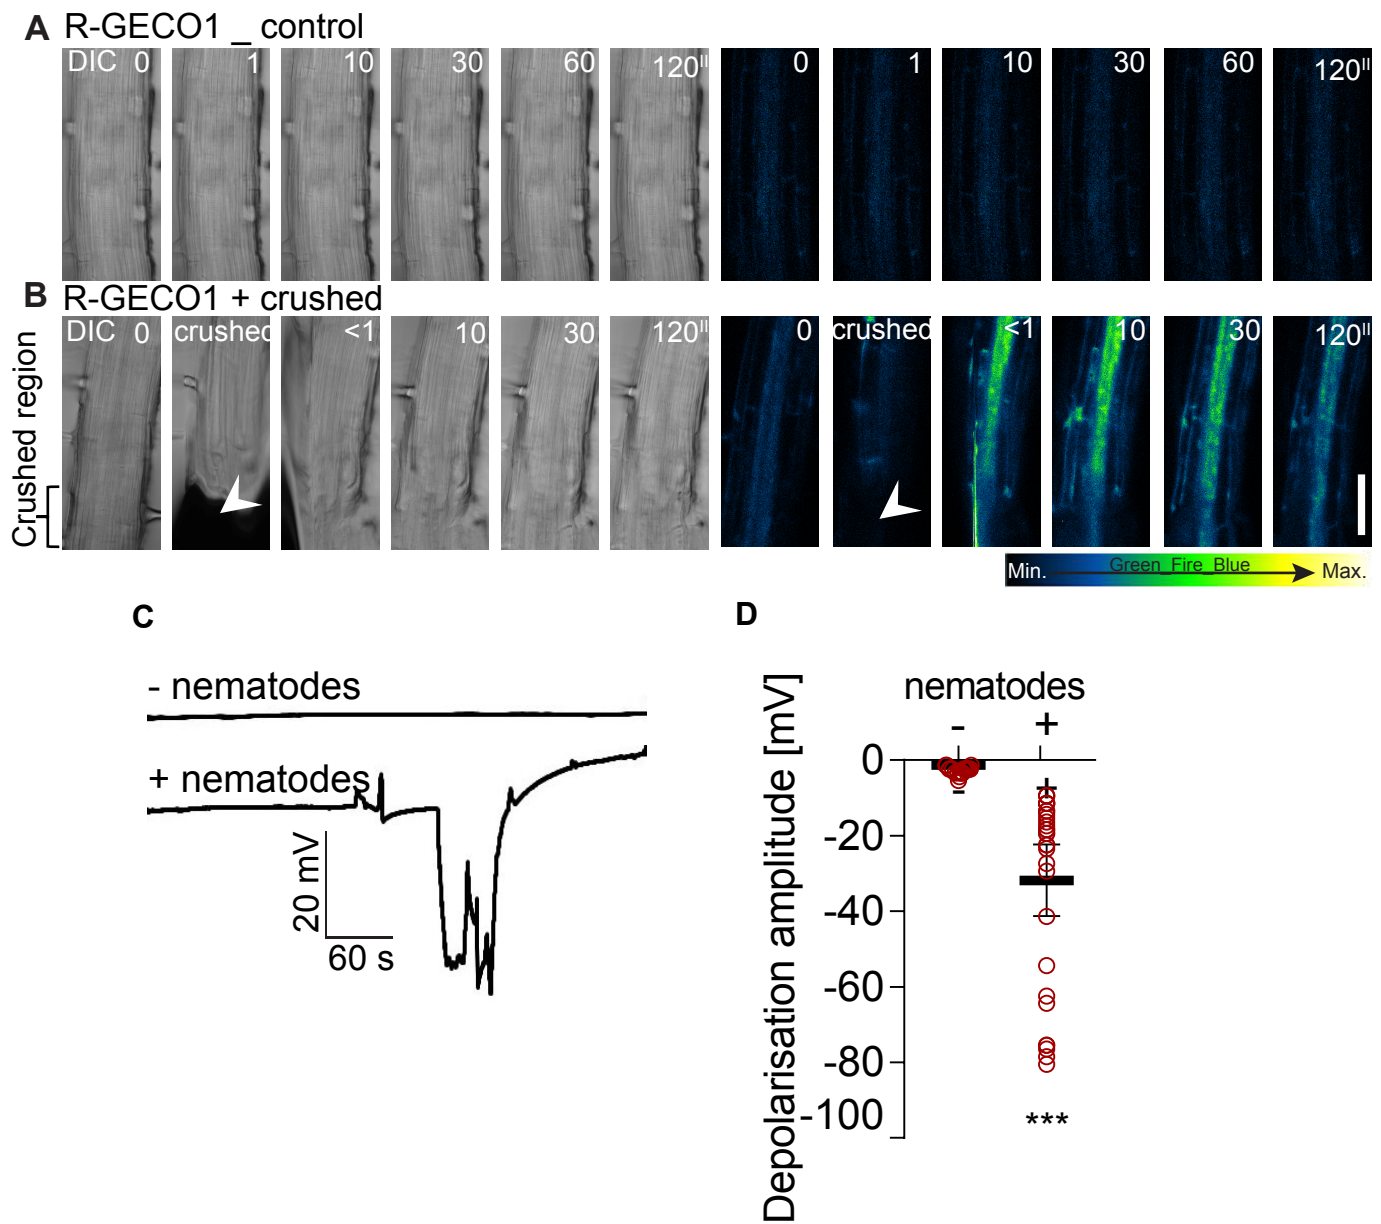

### Appendix Figure S6: Cyst nematode damage induced membrane depolarizations

(**A, B**) 3D (xyt) images monitoring calcium wave propagation (**B**) after crushing root tips.  $\text{Ca}^{2+}$  dynamics were not observed in control roots (**A**) ( $n=10$ ). Live-imaging time points are indicated in the top right corner of each frame. White arrowheads indicate crushed region of the root. (**C, D**) surface potential changes (**C**) recording example and (**D**) quantification of recordings after nematode infection of roots ( $n=27$  events) from 6 recordings, error bars indicate mean value with 95% CI). **Scale bar:** (**A, B**)  $100\ \mu\text{m}$ .



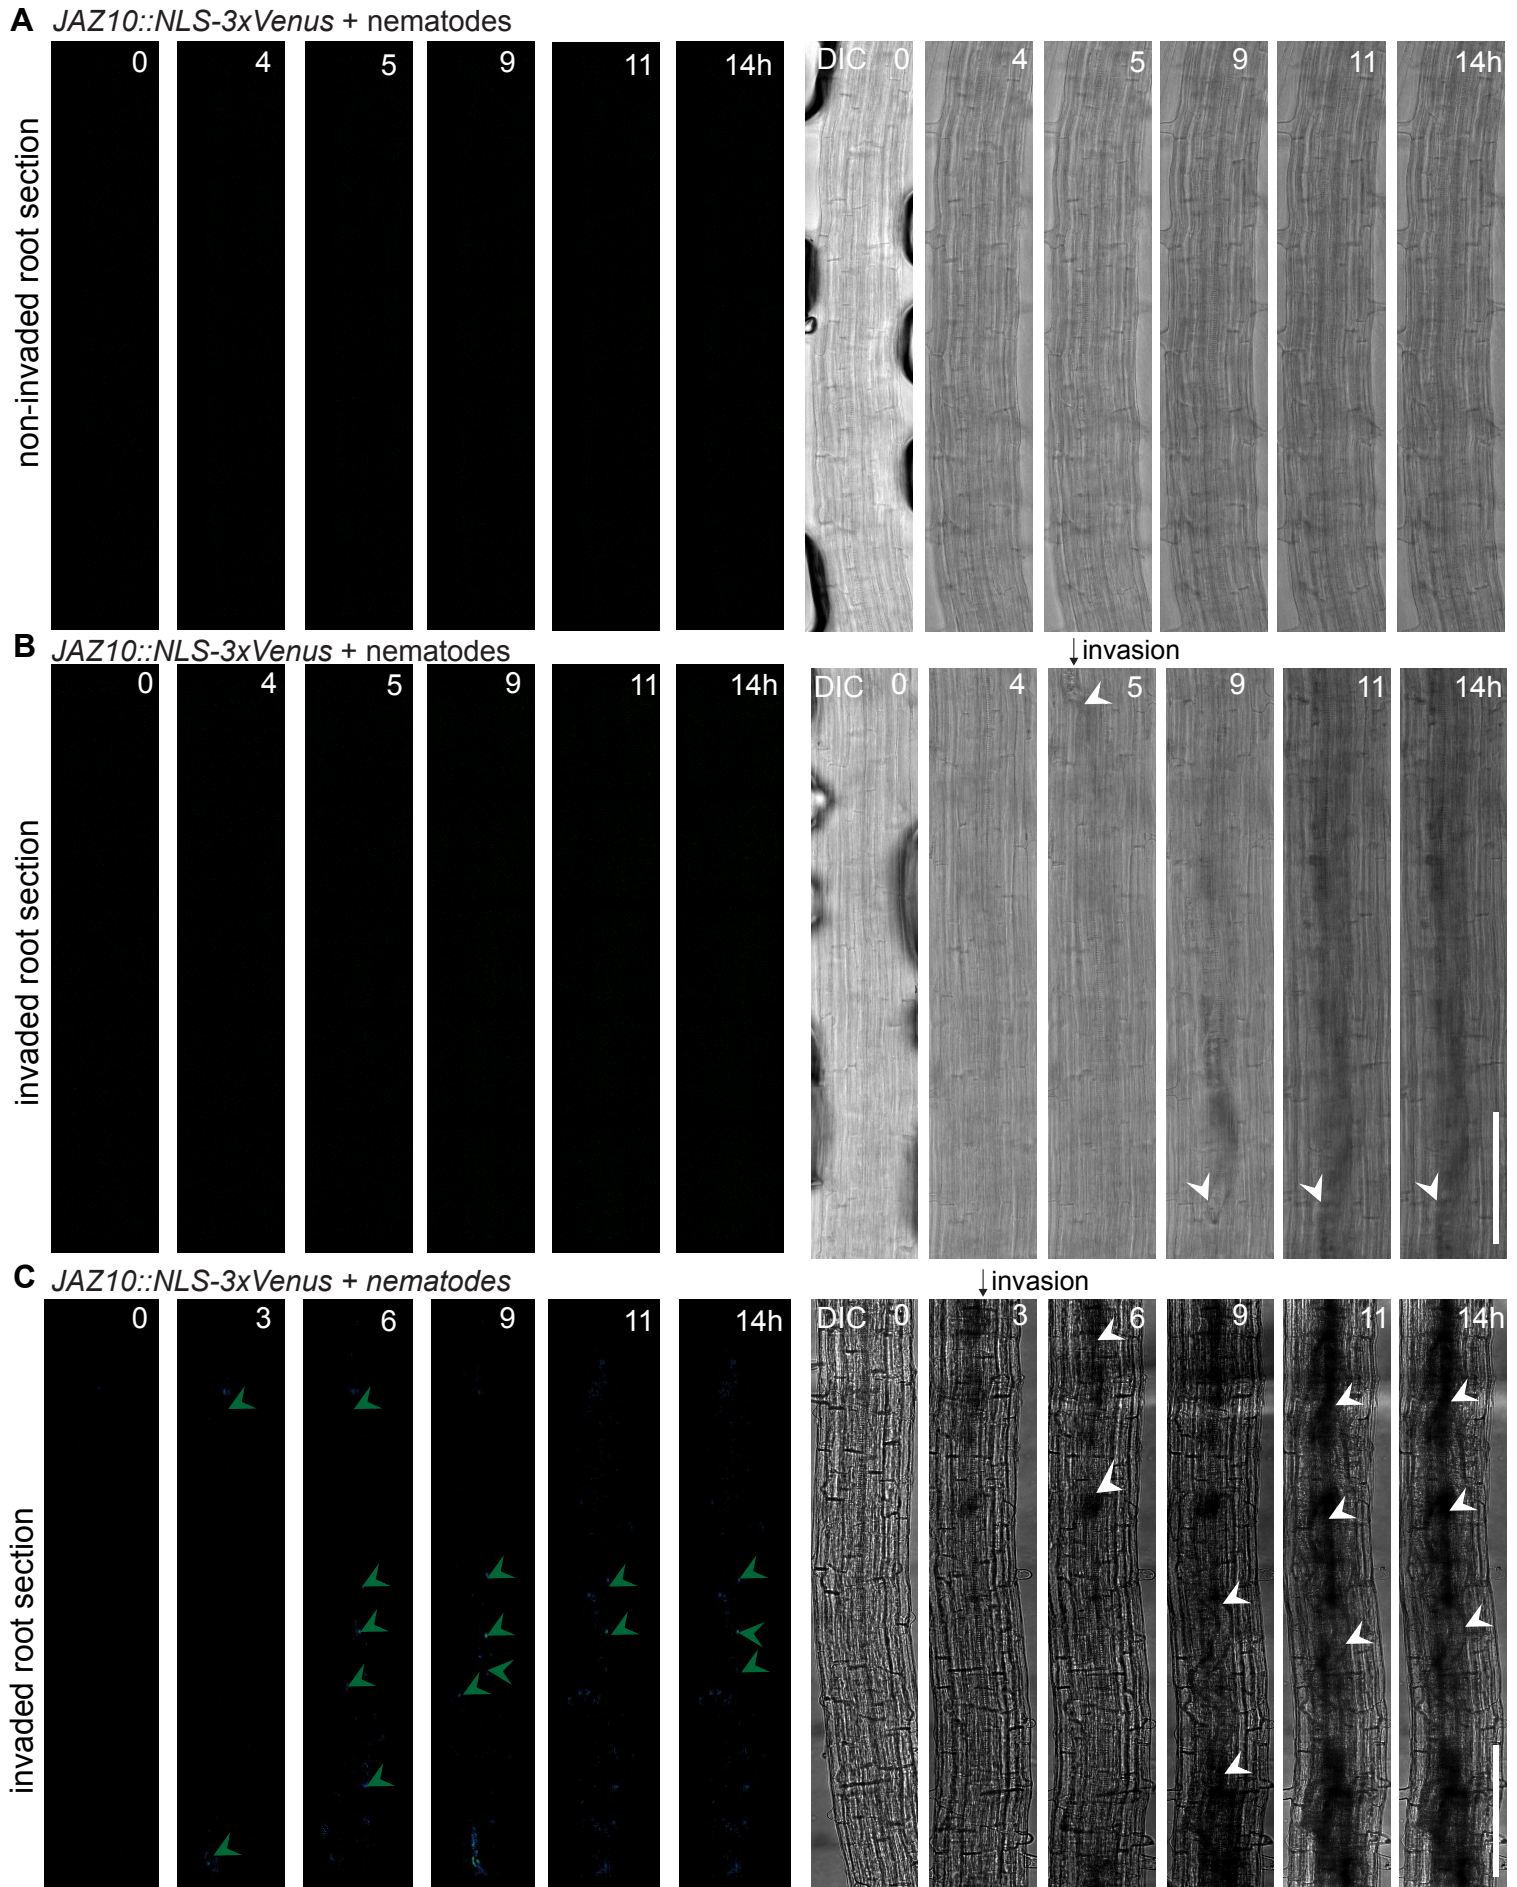

**Appendix Figure S7: Cyst nematode damage leads to weak or no jasmonate response**

(A, C) Tile-scan of XYZT stacks monitoring jasmonate response with *JAZ10::NLS-3xVenus* prior to cyst nematode (*Heterodera schachtii*) infection in 5-day-old roots. (A) Absence of *JAZ10::NLS-3xVenus* response in a non-invaded root section over 14h (n=10). (B, C) After nematodes invaded the root *JAZ10::NLS-3xVenus* we detected very weak (n=3) or no (n=5) response over 14h. Time points at top right corners of images. White arrows indicate nematode positions inside the root, green arrows indicate weak *JAZ10::NLS-3xVenus* response and the black arrow indicate time of nematode invasion into the root. Scale bar: (A, B) 200µm (C) 150µm.
